# Supplementary material for: Feasibility of urinary microRNA detection in breast cancer patients and its potential as an innovative non-invasive biomarker
Source: PubMed Central journal article supplement (PMC4383066; doi:10.1186/s12885-015-1190-4), 2015-03-28

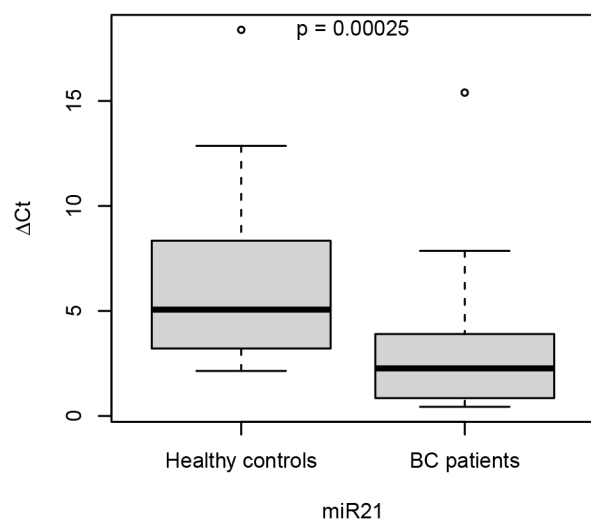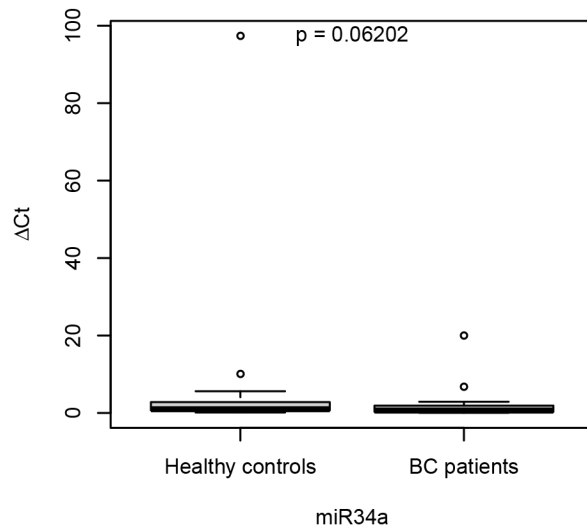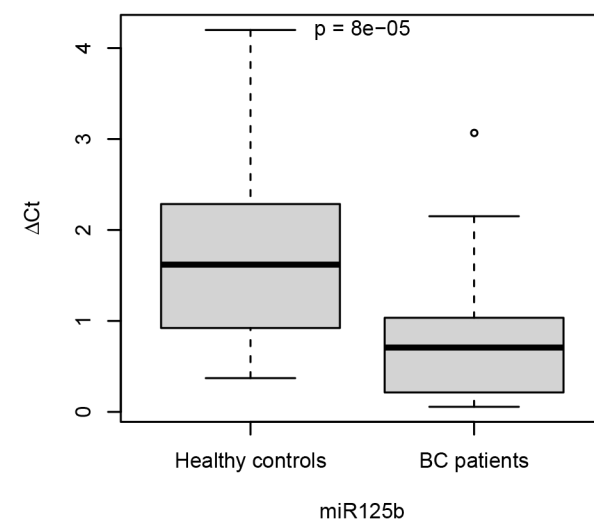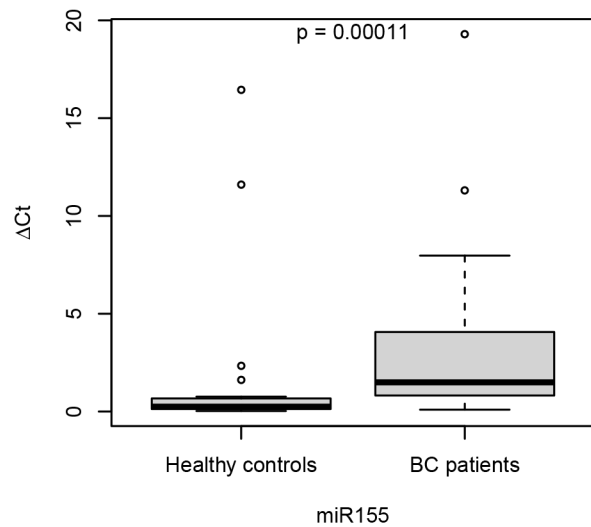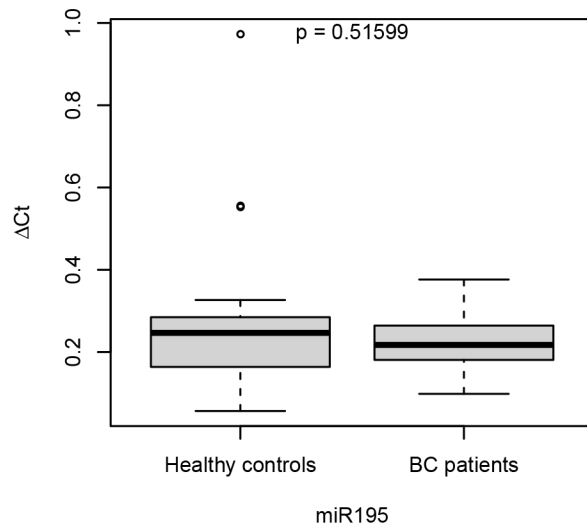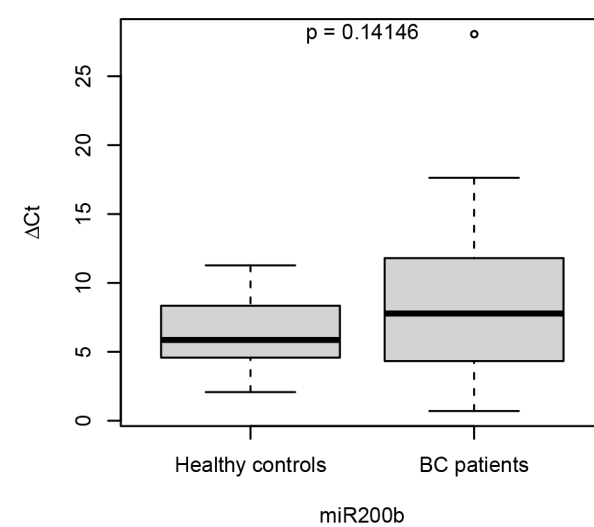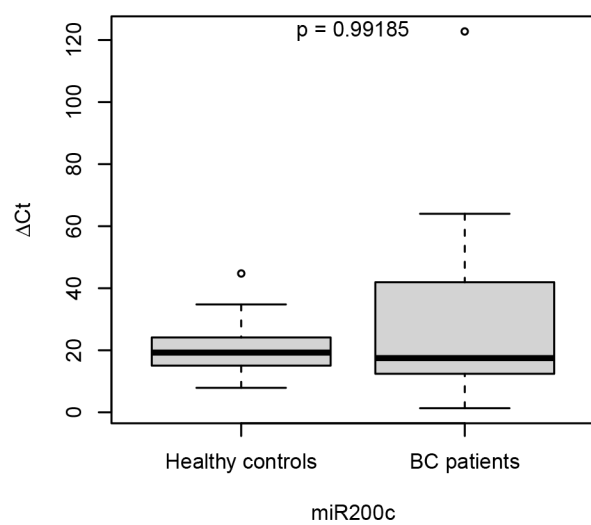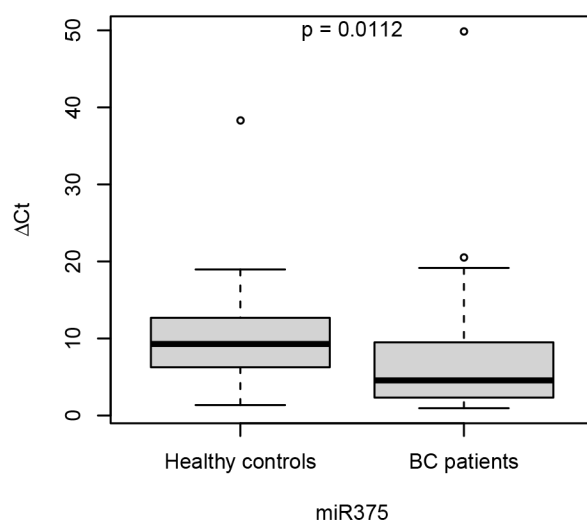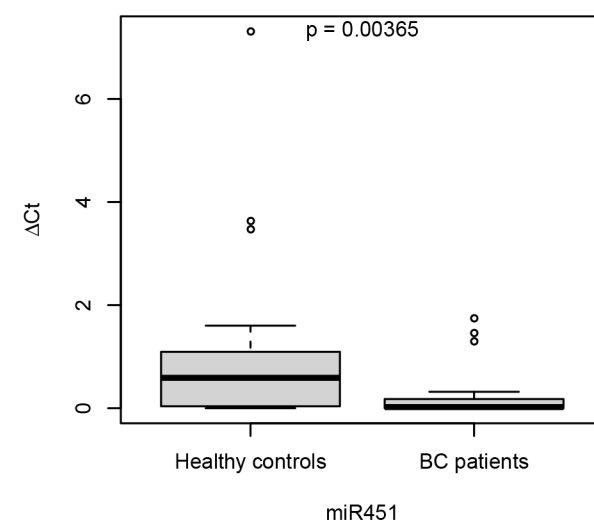

Supplement: 12885_2015_1190_MOESM4_ESM.pdf [file 12885_2015_1190_MOESM4_ESM.pdf]
