# Supplementary material for: Feasibility of urinary microRNA detection in breast cancer patients and its potential as an innovative non-invasive biomarker
Source: Springer Nature journal article supplement (doi:10.1186/s12885-015-1190-4), 2015-03-27

**1****A****Inter-assay variance**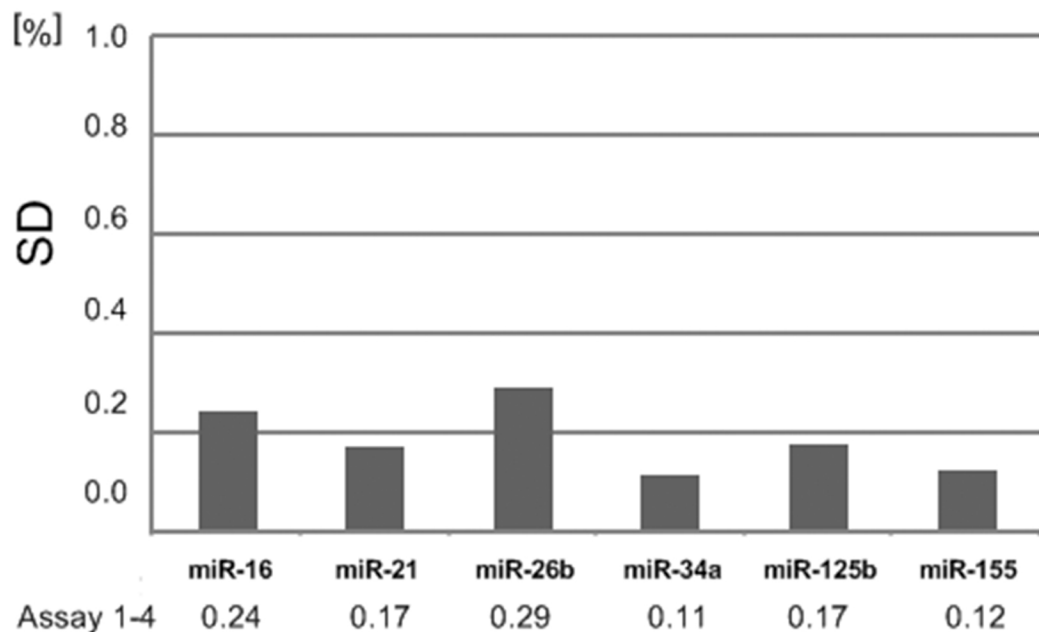**B****Intra-assay variance**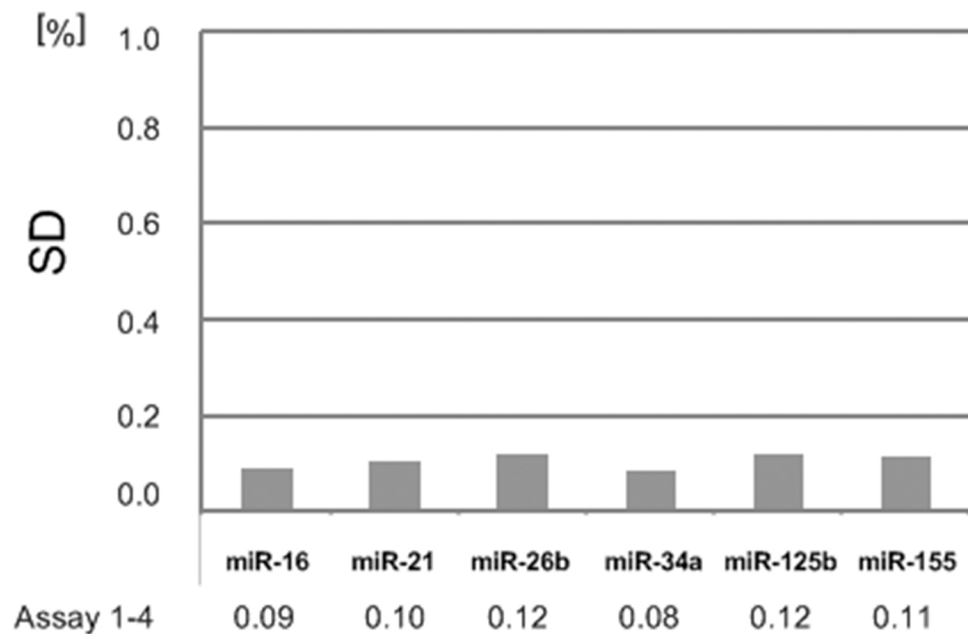

Supplement: MOESM1 [file 9744164]
