# Supplementary material for: Feasibility of urinary microRNA detection in breast cancer patients and its potential as an innovative non-invasive biomarker
Source: Springer Nature journal article supplement (doi:10.1186/s12885-015-1190-4), 2015-03-27
Supplement: MOESM2 [file 9744164]

**HKG expression stability**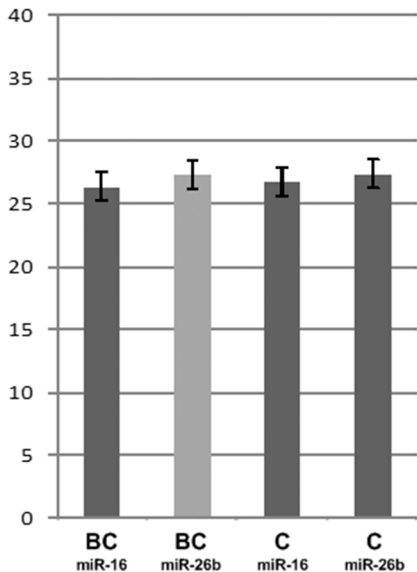

|          |       |       |       |       |
|----------|-------|-------|-------|-------|
| Geo mean | 26.34 | 27.28 | 26.72 | 27.37 |
| SD       | 2.26  | 2.38  | 2.13  | 1.57  |
